# Supplementary material for: Causal Effect of Blood Pressure on Bone Mineral Density and Fracture: A Mendelian Randomization Study
Source: Front Endocrinol (Lausanne). 2021 Aug 4;12:716681. doi: 10.3389/fendo.2021.716681 (PMC8371435; doi:10.3389/fendo.2021.716681)
Supplement: Supplementary file 2 [file DataSheet_2.xlsx]

## Sheet: ST2
Supplementary Table 2: Summary information of 102 SNPs for Mendelian randomization analyses
Chromosome	Position	SNPs	Allele1	Number	Beta	SE	P
Systolic blood pressure
1	1685921	rs139385870	D	281890	-0.352	0.05	1.3x10-12
1	15798197	rs3820068	A	310776	0.425	0.06	1.1x10-12
1	89360158	rs10922502	A	323666	-0.382	0.05	2.2x10-15
2	28635740	rs7562	T	319942	0.263	0.05	1.9x10-8
2	37517566	rs13420463	A	330307	0.356	0.05	7.0x10-11
2	208526140	rs55780018	T	304567	-0.391	0.05	5.9x10-16
3	134000025	rs9859176	T	322428	0.322	0.05	1.3x10-11
4	106911742	rs13112725	C	306370	0.435	0.06	1.5x10-14
5	87514515	rs10059921	T	298543	-0.526	0.09	4.0x10-9
5	127868199	rs6595838	A	328401	0.344	0.05	7.6x10-12
6	22130601	rs6911827	T	326471	0.296	0.05	2.0x10-10
6	50683009	rs78648104	T	305426	-0.481	0.08	1.3x10-8
7	131059056	rs13238550	A	325647	0.331	0.05	1.9x10-12
7	139463264	rs1011018	A	325110	-0.329	0.06	1.5x10-8
8	135612745	rs894344	A	329834	-0.258	0.05	3.2x10-8
10	102604514	rs112184198	A	323791	-0.659	0.08	3.6x10-18
13	113636156	rs9549328	T	313787	0.318	0.06	1.5x10-8
14	53377540	rs9888615	T	326235	-0.318	0.05	3.5x10-10
14	63928546	rs8016306	A	329869	0.335	0.06	3.7x10-9
15	81013037	rs35199222	A	323407	0.322	0.05	5.2x10-12
16	75331044	rs11643209	T	309242	-0.339	0.05	1.8x10-12
17	1333598	rs12941318	T	299739	-0.269	0.05	2.5x10-8
17	73949045	rs2467099	T	326401	-0.307	0.06	3.3x10-8
12	26438189	rs6487543	A	244842	0.3	0.05	6.3x10-10
Diastolic blood pressure
1	25030470	rs6686889	T	322575	0.185	0.03	3.6x10-9
1	172357441	rs12405515	T	328543	-0.165	0.03	1.4x10-9
1	217718789	rs12408022	T	320983	0.198	0.03	2.4x10-10
1	227252626	rs10916082	A	327636	-0.177	0.03	8.4x10-9
1	228191075	rs2760061	A	312761	0.23	0.03	2.1x10-16
1	243471192	rs953492	A	325253	0.22	0.03	7.4x10-16
2	25139596	rs55701159	T	321052	0.285	0.04	7.2x10-11
2	40567743	rs4952611	T	309395	-0.157	0.03	4.0x10-8
2	43167878	rs76326501	A	318127	0.419	0.05	3.6x10-18
2	96675166	rs2579519	T	311557	-0.197	0.03	4.8x10-12
2	145646072	rs1438896	T	329278	0.234	0.03	2.0x10-15
2	179786068	rs79146658	T	321318	-0.311	0.05	2.4x10-10
2	191439591	rs7592578	T	304672	-0.24	0.04	9.5x10-12
2	218668732	rs1063281	T	315354	-0.2	0.03	1.3x10-12
3	49913705	rs36022378	T	319983	-0.202	0.03	4.7x10-9
3	50476378	rs743757	C	328836	0.245	0.04	2.4x10-10
3	56726646	rs9827472	T	323058	-0.177	0.03	4.3x10-10
3	154707967	rs143112823	A	297343	-0.403	0.05	1.4x10-14
3	185317674	rs12374077	C	327513	0.163	0.03	9.2x10-9
4	120509279	rs66887589	T	324397	-0.215	0.03	3.4x10-15
5	75038431	rs10078021	T	314172	-0.164	0.03	1.3x10-8
5	173377636	rs72812846	A	312601	-0.209	0.03	2.2x10-11
6	51832494	rs13205180	T	325419	0.168	0.03	7.0x10-10
6	166178451	rs147212971	T	296010	-0.36	0.06	1.6x10-9
6	118572486	rs9372498	A	330625	0.334	0.05	1.8x10-11
8	101676675	rs2978098	A	324424	0.165	0.03	1.5x10-9
8	144060955	rs62524579	A	268645	-0.175	0.03	3.8x10-9
9	21801530	rs4364717	A	327173	-0.175	0.03	1.3x10-10
11	27728102	rs11030119	A	330002	-0.163	0.03	2.9x10-8
11	69079707	rs67330701	T	276760	-0.367	0.05	2.1x10-12
15	66869072	rs7178615	A	318076	-0.179	0.03	2.6x10-10
15	79070000	rs62012628	T	244143	-0.238	0.03	5.1x10-12
15	95312071	rs12906962	T	319952	-0.221	0.03	5.6x10-14
16	4943019	rs12921187	T	326469	-0.174	0.03	2.5x10-10
16	30936743	rs72799341	A	324502	0.185	0.03	5.8x10-9
16	81574197	rs8059962	T	319839	-0.17	0.03	1.3x10-9
17	61559625	rs4308	A	319394	0.213	0.03	6.8x10-14
18	48142854	rs745821	T	330954	0.189	0.03	1.4x10-9
19	30294991	rs62104477	T	320347	0.177	0.03	1.2x10-9
20	8626271	rs6108168	A	327368	-0.211	0.03	1.1x10-11
3	138119952	rs2306374	T	281715	-0.184	0.03	7.4x10-9
Pulse pressure
1	9441949	rs9662255	A	310618	-0.207	0.03	1.9x10-10
1	38455891	rs4360494	C	282851	0.278	0.03	3.7x10-16
1	56576924	rs112557609	A	325952	0.227	0.03	6.8x10-12
1	59653742	rs3889199	A	329486	0.351	0.03	1.8x10-24
2	20881840	rs2289081	C	329140	-0.223	0.03	5.5x10-12
2	46363336	rs11690961	A	327847	0.34	0.05	3.9x10-12
2	65283972	rs74181299	T	324224	0.23	0.03	9.6x10-13
2	85491365	rs11689667	T	330634	0.176	0.03	1.7x10-8
2	216300482	rs1250259	A	325485	-0.314	0.04	8.7x10-19
3	128201889	rs62270945	T	279925	0.607	0.1	1.8x10-9
4	169717148	rs1566497	A	320948	0.236	0.03	1.9x10-13
4	174584663	rs17059668	C	313277	-0.332	0.06	2.8x10-8
5	77837789	rs10057188	A	325985	-0.205	0.03	6.7x10-11
6	121781390	rs11154027	T	316708	0.207	0.03	1.1x10-10
6	152397912	rs36083386	I	323303	0.439	0.05	1.5x10-18
6	159699125	rs449789	C	325584	0.359	0.05	2.4x10-15
6	169587103	rs1322639	A	319866	0.316	0.04	4.8x10-17
7	40447971	rs76206723	A	328162	-0.346	0.05	7.4x10-12
8	42324765	rs2978456	T	304964	-0.188	0.03	1.2x10-8
8	141060027	rs4454254	A	330022	-0.261	0.03	5.1x10-16
9	127900996	rs72765298	T	316271	-0.374	0.05	2.7x10-14
10	30317073	rs9337951	A	299646	0.28	0.04	2.5x10-15
10	32082658	rs10826995	T	327373	-0.212	0.03	1.1x10-9
11	45208141	rs11442819	I	326483	-0.279	0.05	7.1x10-9
11	89224453	rs2289125	A	307682	-0.377	0.04	9.1x10-22
11	117283676	rs8258	T	327038	0.236	0.03	2.9x10-13
12	94880742	rs139236208	A	291244	-0.363	0.06	1.6x10-10
14	98587630	rs9323988	T	327551	-0.212	0.03	4.1x10-11
16	70755610	rs117006983	A	250766	0.986	0.14	4.1x10-12
16	83045790	rs7500448	A	321958	0.329	0.04	1.1x10-19
17	6473828	rs7226020	T	303389	-0.256	0.03	2.3x10-14
17	7571752	rs78378222	T	294053	0.904	0.14	1.8x10-10
17	40317241	rs79089478	T	318326	0.584	0.1	3.1x10-9
17	42060631	rs62080325	A	315689	-0.186	0.03	4.0x10-8
17	60767151	rs740698	T	311450	-0.228	0.03	3.1x10-12
18	43097750	rs7236548	A	330075	0.352	0.04	2.0x10-18
20	19465907	rs6081613	A	315546	0.263	0.04	1.6x10-13
22	19967980	rs12628032	T	310292	0.24	0.03	5.5x10-12
22	42038786	rs73161324	T	267722	0.496	0.07	2.8x10-11
1	208024820	rs12731740	T	279078	-0.249	0.04	1.1x10-8
2	71627539	rs3771371	T	280285	-0.16	0.03	5.8x10-9
11	828916	rs7126805	A	145162	0.222	0.04	3.3x10-9
SNP: single nucleotide polymorphism, SE: standard error.

## Sheet: ST3
Supplementary Table 3: Summary genetic instruments between blood pressure and different outcomes
				Systolic blood pressure			FA-BMD			FN-BMD			LS-BMD			Fall			Fracture
SNPs	Chromosome	Position	Allele1	Beta	SE	P	Beta	SE	P	Beta	SE	P	Beta	SE	P	Beta	SE	P	Beta	SE	P
rs3820068	1	15798197	A	0.425	0.06	1.1x10-12	-0.006026	0.019568	0.762706	0.004212	0.009459	0.663057	0.001161	0.010989	0.91779	0.00736173	0.00572848	0.2	0.006095	0.008358	0.46
rs7562	2	28635740	T	0.263	0.05	1.9x10-8	-0.004872	0.015955	0.764679	0.001674	0.007714	0.831399	-0.014077	0.008973	0.124086	-0.00290558	0.00450943	0.53	0.003212	0.00658	0.67
rs55780018	2	208526140	T	-0.391	0.05	5.9x10-16	-0.03286	0.015728	0.040528	-0.006218	0.007685	0.428568	-0.014307	0.008928	0.11758	-0.01209	0.00452218	0.0073	-0.00242	0.006593	0.69
rs9859176	3	134000025	T	0.322	0.05	1.3x10-11	0.031335	0.015958	0.054207	0.011889	0.007769	0.13431	0.013359	0.009029	0.148464	_	_	_	_	_	_
rs13112725	4	106911742	C	0.435	0.06	1.5x10-14	-0.043166	0.017657	0.01655	-0.004505	0.008735	0.613813	0.007364	0.010141	0.478189	-0.0102008	0.00525027	0.054	0.002682	0.007658	0.75
rs10059921	5	87514515	T	-0.526	0.09	4.0x10-9	0.009294	0.028045	0.745226	-0.018741	0.013676	0.179955	0.002923	0.015869	0.857207	-0.00703248	0.00856374	0.41	-0.004759	0.012486	0.75
rs6595838	5	127868199	A	0.344	0.05	7.6x10-12	-0.01351	0.017179	0.440672	0.010071	0.008267	0.23324	-0.01161	0.00962	0.23849	0.00583291	0.00489276	0.23	-0.003232	0.007131	0.63
rs6911827	6	22130601	T	0.296	0.05	2.0x10-10	0.024488	0.01557	0.123027	0.002885	0.007544	0.708261	-0.014891	0.008817	0.099047	-0.00464287	0.00450708	0.31	0.003197	0.006571	0.63
rs78648104	6	50683009	T	-0.481	0.08	1.3x10-8	-0.012895	0.027999	0.651671	-0.019817	0.012974	0.133992	0.016265	0.015098	0.290919	0.00337683	0.0080177	0.66	0.01858	0.011687	0.097
rs13238550	7	131059056	A	0.331	0.05	1.9x10-12	-0.03654	0.015959	0.024792	-0.002902	0.007665	0.711065	-0.014512	0.008943	0.11301	0.00142067	0.0045771	0.75	0.003425	0.00667	0.68
&rs1011018	7	139463264	A	-0.329	0.06	1.5x10-8	-0.005002	0.019464	0.801063	0.004917	0.009467	0.611322	0.001331	0.011025	0.906098	0.00331602	0.00568265	0.56	0.013443	0.008291	0.091
rs894344	8	135612745	A	-0.258	0.05	3.2x10-8	0.020929	0.015986	0.199223	-0.006646	0.007425	0.37983	-0.002528	0.008644	0.774309	0.00177605	0.00456215	0.7	0.006979	0.006653	0.29
rs112184198	10	102604514	A	-0.659	0.08	3.6x10-18	0.008163	0.025931	0.757581	-0.001155	0.012246	0.926423	0.002829	0.014183	0.845511	-0.00901499	0.00737554	0.22	0.000553	0.010753	0.98
rs9549328	13	113636156	T	0.318	0.06	1.5x10-8	-0.008304	0.018687	0.663056	0.015346	0.009027	0.096245	0.01486	0.010522	0.167797	0.000959791	0.00535409	0.85	-0.004523	0.007805	0.59
rs9888615	14	53377540	T	-0.318	0.05	3.5x10-10	0.003175	0.017109	0.855614	-0.001892	0.008274	0.822945	0.006384	0.009631	0.517425	0.00436602	0.00496828	0.38	0.004109	0.007243	0.57
rs8016306	14	63928546	A	0.335	0.06	3.7x10-9	-0.013548	0.019162	0.488183	0.009514	0.009263	0.314926	0.022707	0.010747	0.039073	-0.0123065	0.00559084	0.027	0.003827	0.008157	0.64
rs35199222	15	81013037	A	0.322	0.05	5.2x10-12	-0.027885	0.015706	0.081714	-0.01324	0.007559	0.086541	-0.013277	0.008792	0.140239	0.00814111	0.00451854	0.072	0.009233	0.006589	0.16
#rs11643209	16	75331044	T	-0.339	0.05	1.8x10-12	0.012931	0.016371	0.438661	0.017788	0.016187	0.282256	-0.015586	0.017076	0.372686	0.00125286	0.00502358	0.79	-0.008914	0.007321	0.19
rs12941318	17	1333598	T	-0.269	0.05	2.5x10-8	0.008712	0.01572	0.58689	0.00133	0.007845	0.868265	-0.002796	0.009121	0.764671	-0.000998274	0.00449493	0.81	-0.01558	0.006554	0.016
rs2467099	17	73949045	T	-0.307	0.06	3.3x10-8	-0.002136	0.018618	0.910427	-0.006187	0.008995	0.50098	-0.013718	0.010471	0.200706	0.00487861	0.00536193	0.36	0.012412	0.007812	0.12
rs6487543	12	26438189	A	0.3	0.05	6.3x10-10	0.000782	0.018403	0.966754	0.007383	0.009004	0.422383	0.021924	0.021924	0.040169	0.00416524	0.0054602	0.45	0.004436	0.007966	0.62
				Diastolic blood pressure
rs6686889	1	25030470	T	0.185	0.03	3.6x10-9	0.002298	0.018038	0.90059	-0.016784	0.00859	0.055914	-0.008466	0.01001	0.408839	-0.00450937	0.00519778	0.39	0.003687	0.007581	0.67
rs12405515	1	172357441	T	-0.165	0.03	1.4x10-9	-0.002692	0.016143	0.87012	0.016135	0.007733	0.040675	0.001308	0.008985	0.886542	0.00225209	0.00453822	0.62	-0.002308	0.006616	0.73
rs12408022	1	217718789	T	0.198	0.03	2.4x10-10	0.003562	0.017691	0.843496	-0.006946	0.00855	0.426683	-0.00405	0.009937	0.690647	0.00179286	0.00516053	0.72	0.003765	0.007527	0.57
rs2760061	1	228191075	A	0.23	0.03	2.1x10-16	0.033027	0.015983	0.042777	0.015652	0.007672	0.045929	0.012334	0.008975	0.179538	-0.00147245	0.00453443	0.74	-0.009702	0.006611	0.13
rs953492	1	243471192	A	0.22	0.03	7.4x10-16	0.000193	0.015749	0.990414	0.00347	0.007507	0.651094	-0.005116	0.008773	0.568963	0.00385734	0.00450802	0.39	-0.000103	0.006572	0.96
rs55701159	2	25139596	T	0.285	0.04	7.2x10-11	-0.061688	0.024312	0.012871	0.005607	0.011757	0.640766	0.01102	0.013611	0.429116	0.0146113	0.0070919	0.042	0.001259	0.010333	0.88
rs4952611	2	40567743	T	-0.157	0.03	4.0x10-8	0.005526	0.015702	0.730052	0.009254	0.007679	0.238345	-0.004805	0.008936	0.599493	0.00595966	0.00463671	0.2	0.002742	0.006759	0.74
rs76326501	2	43167878	A	0.419	0.05	3.6x10-18	-0.004181	0.027498	0.881472	-0.000908	0.013283	0.946658	0.014016	0.015458	0.375857	0.0106582	0.00781288	0.17	-0.001728	0.011369	0.87
rs2579519	2	96675166	T	-0.197	0.03	4.8x10-12	0.006312	0.016478	0.707207	0.008364	0.007887	0.299446	0.014946	0.00918	0.111806	-0.00055353	0.00462786	0.9	-0.002295	0.006746	0.76
rs1438896	2	145646072	T	0.234	0.03	2.0x10-15	-0.00016	0.01706	0.992647	-0.013051	0.008255	0.12184	0.011985	0.009619	0.223648	-0.012192	0.00491103	0.013	-0.009924	0.00716	0.16
rs79146658	2	179786068	T	-0.311	0.05	2.4x10-10	-0.01564	0.027916	0.582786	0.004958	0.013502	0.719368	-0.010745	0.015713	0.504242	-0.00843628	0.00791602	0.29	0.002036	0.011559	0.82
rs7592578	2	191439591	T	-0.24	0.04	9.5x10-12	-0.003235	0.020151	0.874899	0.003884	0.009656	0.693868	-0.00642	0.01126	0.577627	0.0129239	0.0057777	0.025	-0.014156	0.008419	0.096
rs1063281	2	218668732	T	-0.2	0.03	1.3x10-12	-0.015708	0.015727	0.327375	0.002714	0.00785	0.735153	0.002867	0.009104	0.758402	-0.00540354	0.00461702	0.24	-0.007883	0.006734	0.24
rs36022378	3	49913705	T	-0.202	0.03	4.7x10-9	-0.010734	0.020069	0.600004	-0.005071	0.009577	0.604462	-0.012692	0.011225	0.269462	0.00101963	0.00557315	0.84	0.006364	0.008147	0.45
rs9827472	3	56726646	T	-0.177	0.03	4.3x10-10	-0.017207	0.016602	0.309506	-0.00492	0.007873	0.540945	-0.002759	0.009197	0.769486	-0.0082622	0.00465391	0.076	-0.000121	0.006787	0.97
rs143112823	3	154707967	A	-0.403	0.05	1.4x10-14	-0.013333	0.028334	0.644528	0.00655	0.01369	0.639695	0.006584	0.015994	0.687678	0.00298787	0.00772802	0.72	0.000891	0.011259	0.86
rs12374077	3	185317674	C	0.163	0.03	9.2x10-9	-0.000873	0.016572	0.95881	0.004446	0.007869	0.580339	-0.000944	0.009171	0.919862	-0.00569413	0.00472414	0.23	-0.012434	0.00689	0.067
rs66887589	4	120509279	T	-0.215	0.03	3.4x10-15	-0.000987	0.016366	0.95284	0.003198	0.007634	0.681914	0.010083	0.008937	0.270487	0.00448166	0.00449961	0.32	-0.006853	0.006558	0.3
rs10078021	5	75038431	T	-0.164	0.03	1.3x10-8	0.00885	0.016544	0.59994	0.002975	0.007841	0.710454	0.008839	0.009162	0.346081	0.00324397	0.0046736	0.49	-0.003284	0.006816	0.57
rs13205180	6	51832494	T	0.168	0.03	7.0x10-10	-0.024435	0.015738	0.127898	0.002742	0.007536	0.721858	0.007111	0.008785	0.429195	0.000142853	0.00449751	0.97	0.007444	0.006558	0.28
rs147212971	6	166178451	T	-0.36	0.06	1.6x10-9	0.002368	0.036716	0.949549	-0.018081	0.019663	0.368247	-0.007711	0.021519	0.726384	_	_	_	_	_	_
rs9372498	6	118572486	A	0.334	0.05	1.8x10-11	0.005487	0.029027	0.852937	0.011356	0.013636	0.415142	0.022442	0.015989	0.170404	-0.00903289	0.0084165	0.29	0.005443	0.012296	0.72
rs2978098	8	101676675	A	0.165	0.03	1.5x10-9	-0.002613	0.015619	0.869677	-0.004292	0.007543	0.577773	-0.004524	0.0088	0.615664	0.00456988	0.0045065	0.32	-0.001791	0.006572	0.79
rs62524579	8	144060955	A	-0.175	0.03	3.8x10-9	0.003897	0.016009	0.811347	-0.002453	0.0078	0.758263	-0.010108	0.009114	0.278736	-0.0128101	0.00449971	0.0044	-0.004563	0.006561	0.5
rs4364717	9	21801530	A	-0.175	0.03	1.3x10-10	-0.000331	0.01628	0.01628	0.006673	0.007632	0.392246	0.015188	0.008946	0.097283	-0.0100604	0.00451108	0.025	0.001349	0.006578	0.86
rs11030119	11	27728102	A	-0.163	0.03	2.9x10-8	0.021914	0.016992	0.206012	0.008575	0.008206	0.306575	0.028232	0.009565	0.003954	0.0132373	0.0048603	0.0064	-0.001239	0.007084	0.85
rs67330701	11	69079707	T	-0.367	0.05	2.1x10-12	-0.015813	0.02768	0.575403	-0.010804	0.013818	0.444255	-0.0085	0.016115	0.606479	-0.0133223	0.00804137	0.096	-0.009329	0.011728	0.36
rs62012628	15	79070000	T	-0.238	0.03	5.1x10-12	0.038199	0.018173	0.039366	0.009883	0.008748	0.267665	0.018439	0.010164	0.075356	-0.00457897	0.00500364	0.37	0.003958	0.007298	0.58
rs12906962	15	95312071	T	-0.221	0.03	5.6x10-14	-0.010333	0.016778	0.545974	-0.008689	0.008103	0.294035	0.0136	0.009434	0.159123	0.00769136	0.00484241	0.11	0.005266	0.007063	0.46
rs12921187	16	4943019	T	-0.174	0.03	2.5x10-10	-0.038096	0.015709	0.017437	0.010574	0.00762	0.174511	0.002626	0.008878	0.772637	-0.00287979	0.00453416	0.53	0.006193	0.006612	0.36
rs72799341	16	30936743	A	0.185	0.03	5.8x10-9	-0.011186	0.023873	0.645934	-0.013742	0.009981	0.177916	0.002729	0.012293	0.828359	0.018	0.00524051	0.00055	0.019754	0.007645	0.013
rs8059962	16	81574197	T	-0.17	0.03	1.3x10-9	-0.011972	0.015704	0.454778	0.001891	0.00761	0.807898	0.001719	0.008864	0.849717	0.0023598	0.00457545	0.6	-0.00321	0.006672	0.64
rs4308	17	61559625	A	0.213	0.03	6.8x10-14	0.001791	0.015987	0.912524	0.00586	0.007769	0.460506	-0.004138	0.009042	0.654938	-0.00176371	0.00466695	0.7	-0.004108	0.006807	0.55
rs745821	18	48142854	T	0.189	0.03	1.4x10-9	0.014105	0.018284	0.44939	-0.01618	0.008627	0.06649	0.002094	0.01005	0.838746	0.0121004	0.00526748	0.022	0.016971	0.007678	0.024
rs62104477	19	30294991	T	0.177	0.03	1.2x10-9	-0.024947	0.016572	0.139921	-0.011898	0.00807	0.149084	0.012384	0.009384	0.197414	0.00399551	0.00478313	0.41	0.004642	0.006973	0.47
rs6108168	20	8626271	A	-0.211	0.03	1.1x10-11	-0.003308	0.01797	0.856734	0.00755	0.008615	0.391142	0.005398	0.009999	0.598028	0.0121775	0.00514393	0.019	0.007182	0.0075	0.36
rs2306374	3	138119952	T	-0.184	0.03	7.4x10-9	0.015524	0.021062	0.469873	-0.000818	0.010862	0.941235	-0.000555	0.011882	0.9636	-0.00413837	0.00609579	0.51	-0.011331	0.008883	0.2
				Pulse pressure
rs9662255	1	9441949	A	-0.207	0.03	1.9x10-10	-0.019245	0.015584	0.225916	0.010631	0.007754	0.179755	0.000707	0.008979	0.938663	0.00139128	0.00454817	0.77	-0.003879	0.006629	0.58
rs4360494	1	38455891	C	0.278	0.03	3.7x10-16	0.019414	0.01573	0.226219	0.010829	0.007721	0.168812	0.013898	0.008929	0.127052	-0.00905041	0.00451731	0.046	-0.014271	0.006589	0.028
rs112557609	1	56576924	A	0.227	0.03	6.8x10-12	0.010927	0.016706	0.521331	0.001857	0.007965	0.819521	0.006963	0.009293	0.464328	-0.00193392	0.00473503	0.68	-0.006364	0.006905	0.33
rs2289081	2	20881840	C	-0.223	0.03	5.5x10-12	-0.012642	0.016298	0.446939	0.001656	0.001656	0.834629	-0.011693	0.009037	0.206315	0.000445821	0.00468612	0.92	0.007109	0.006836	0.33
rs11690961	2	46363336	A	0.34	0.05	3.9x10-12	-0.022009	0.024168	0.371879	-0.000917	0.01173	0.939024	-0.005897	0.01364	0.672895	-0.0133675	0.00697625	0.056	-0.001303	0.01016	0.98
*rs74181299	2	65283972	T	0.23	0.03	9.6x10-13	0.003141	0.016273	0.849873	0.005652	0.007743	0.475073	0.000967	0.009024	0.91662	-0.00241313	0.00463171	0.6	0.001273	0.006758	0.84
rs11689667	2	85491365	T	0.176	0.03	1.7x10-8	0.038322	0.015553	0.015715	0.015078	0.007508	0.049438	0.022959	0.008753	0.010435	-0.00211094	0.00451752	0.63	-0.019122	0.006587	0.0038
rs1250259	2	216300482	A	-0.314	0.04	8.7x10-19	0.001009	0.017671	0.955323	-0.014419	0.008311	0.088731	-0.002873	0.009631	0.769998	-0.00809447	0.00509597	0.11	-0.019187	0.007432	0.012
rs62270945	3	128201889	T	0.607	0.1	1.8x10-9	0.067051	0.06306	0.297129	0.026827	0.026752	0.326477	0.040413	0.032698	0.227375	-0.0013385	0.0135202	0.92	0.025261	0.019714	0.23
rs1566497	4	169717148	A	0.236	0.03	1.9x10-13	-0.000765	0.015858	0.962262	-0.00965	0.008165	0.247461	0.00033	0.008901	0.971078	-0.00413371	0.00458652	0.36	-0.007033	0.006686	0.33
rs17059668	4	174584663	C	-0.332	0.06	2.8x10-8	0.009934	0.029073	0.737622	-0.005681	0.014201	0.69551	-0.013717	0.016548	0.418189	-0.000584288	0.00849187	0.94	-0.001342	0.012378	0.89
rs10057188	5	77837789	A	-0.205	0.03	6.7x10-11	0.016144	0.015756	0.315059	0.006378	0.007537	0.407667	0.029024	0.008782	0.001254	-0.00670906	0.00450933	0.14	-0.005316	0.006572	0.43
rs11154027	6	121781390	T	0.207	0.03	1.1x10-10	-0.012724	0.016096	0.438285	0.002951	0.007709	0.708006	-0.010407	0.009001	0.258779	-0.0077139	0.00450331	0.089	0.002089	0.006562	0.8
rs36083386	6	152397912	I	0.439	0.05	1.5x10-18	_	_	_	_	_	_	_	_	_	_	_	_	_	_	_
rs1322639	6	169587103	A	0.316	0.04	4.8x10-17	0.016736	0.018917	0.385684	0.003546	0.009018	0.700406	0.003889	0.010544	0.718675	0.00354199	0.00541772	0.5	-0.000856	0.007897	0.91
rs76206723	7	40447971	A	-0.346	0.05	7.4x10-12	-0.010925	0.024974	0.667999	-0.015081	0.012202	0.226522	0.00045	0.014177	0.975269	0.0113224	0.00732362	0.12	0.005979	0.010677	0.65
rs2978456	8	42324765	T	-0.188	0.03	1.2x10-8	0.03353	0.015403	0.03283	0.003864	0.007773	0.626717	0.016535	0.008951	0.071201	0.00174204	0.00450729	0.71	0.006282	0.006571	0.38
rs4454254	8	141060027	A	-0.261	0.03	5.1x10-16	-0.02503	0.016038	0.125929	0.001521	0.007775	0.848193	-0.000666	0.009099	0.943027	0.00326489	0.00464103	0.48	-0.004189	0.006766	0.58
rs72765298	9	127900996	T	-0.374	0.05	2.7x10-14	-0.043741	0.024161	0.075878	-0.004639	0.011675	0.697447	-0.005101	0.013589	0.713896	-0.012001	0.0067124	0.074	-0.00961	0.009786	0.36
rs9337951	10	30317073	A	0.28	0.04	2.5x10-15	0.007204	0.016593	0.670345	-0.00376	0.007834	0.637741	-0.009682	0.009055	0.294564	-0.00701658	0.00482944	0.15	-0.000115	0.00704	0.94
rs11442819	11	45208141	I	-0.279	0.05	7.1x10-9	0.01592	0.08809	0.859332	0.001198	0.044698	0.97907	-0.000172	0.05182	0.997419	_	_	_	_	_	_
rs2289125	11	89224453	A	-0.377	0.04	9.1x10-22	-0.013056	0.019009	0.500694	0.003303	0.00922	0.725256	0.00687	0.010648	0.5271	-0.00327576	0.00551164	0.55	-0.008942	0.008039	0.25
rs8258	11	117283676	T	0.236	0.03	2.9x10-13	0.007528	0.016042	0.645443	0.004824	0.007777	0.543961	0.012612	0.009046	0.173322	0.00156884	0.00462858	0.73	0.002591	0.006748	0.69
rs139236208	12	94880742	A	-0.363	0.06	1.6x10-10	-0.011555	0.027622	0.681692	0.006519	0.013381	0.633585	0.014205	0.015656	0.375556	0.00212543	0.00764899	0.77	-0.007766	0.01114	0.49
rs9323988	14	98587630	T	-0.212	0.03	4.1x10-11	-0.052988	0.016029	0.001196	-0.002994	0.007682	0.703	-0.018209	0.008956	0.047082	0.00264456	0.0046235	0.55	-0.007156	0.006742	0.31
rs117006983	16	70755610	A	0.986	0.14	4.1x10-12	0.179027	0.082463	0.033299	0.042622	0.034073	0.220953	0.087588	0.041682	0.040159	-0.0297254	0.0208781	0.15	-0.014899	0.030336	0.57
rs7500448	16	83045790	A	0.329	0.04	1.1x10-19	0.029908	0.017908	0.101518	-0.003121	0.008628	0.723385	0.005598	0.010044	0.586244	-0.00443784	0.00519997	0.4	0.003008	0.007581	0.67
rs7226020	17	6473828	T	-0.256	0.03	2.3x10-14	0.013356	0.01582	0.407793	-0.001873	0.007652	0.810651	-0.004383	0.008913	0.631013	_	_	_	_	_	_
rs79089478	17	40317241	T	0.584	0.1	3.1x10-9	0.072489	0.047112	0.13137	-0.001241	0.022744	0.957414	0.015507	0.026382	0.565929	0.003285	0.0138651	0.81	-0.016635	0.02018	0.43
rs740698	17	60767151	T	-0.228	0.03	3.1x10-12	-0.001246	0.015749	0.938158	-0.008254	0.00758	0.2854	-0.004253	0.00878	0.634916	0.00438085	0.0045211	0.34	2.9e-05	0.006589	0.99
rs7236548	18	43097750	A	0.352	0.04	2.0x10-18	0.021378	0.019927	0.292833	0.014629	0.009613	0.136469	0.010998	0.01122	0.338368	-0.00903526	0.00581792	0.12	-0.000758	0.008485	0.89
rs6081613	20	19465907	A	0.263	0.04	1.6x10-13	-0.007754	0.01727	0.659792	0.001942	0.008262	0.818098	-0.004187	0.009604	0.670279	0.00207509	0.00503457	0.68	0.001212	0.007344	0.92
rs12628032	22	19967980	T	0.24	0.03	5.5x10-12	4.3e-05	0.01735	0.998048	0.000379	0.010367	0.97144	0.026113	0.011073	0.021291	0.0201734	0.00486978	3.5e-05	0.016711	0.007098	0.021
rs73161324	22	42038786	T	0.496	0.07	2.8x10-11	0.037055	0.035249	0.302639	0.005452	0.019869	0.788307	0.017311	0.022454	0.451483	0.00763427	0.00985162	0.45	0.028699	0.014361	0.044
rs12731740	1	208024820	T	-0.249	0.04	1.1x10-8	-0.004778	0.025497	0.025497	-0.007482	0.012344	0.552135	-0.012528	0.01421	0.387439	0.000963807	0.00747139	0.92	0.004159	0.010883	0.75
rs3771371	2	71627539	T	-0.16	0.03	5.8x10-9	0.013929	0.016097	0.016097	0.00083	0.007469	0.913188	-0.005621	0.008665	0.524889	-0.00618733	0.00453331	0.17	-0.013559	0.006611	0.047
rs7126805	11	828916	A	0.222	0.04	3.3x10-9	0.016097	0.017205	0.676986	0.012903	0.008623	0.142098	0.016846	0.009915	0.095827	-0.00867868	0.00505004	0.08	0.008908	0.007367	0.25
&rs1011018 was used as a proxy for rs1011018 among the association between systolic blood pressure and outcomes (fall and fracture), #rs11646852 was used as a proxy for rs11643209 among the association between systolic blood pressure and FA-BMD, and *rs2540949 was used as a proxy for rs74181299 among the association between pulse pressure and outcomes (fall and fracture). — denoted that no proxy …
